# Supplementary material for: A Systematic Review and Meta-Analysis of the Association between Water, Sanitation, and Hygiene Exposures and Cholera in Case–Control Studies
Source: PubMed Central journal article supplement (PMC6090371; doi:10.4269/ajtmh.17-0897), 2018-07-02
Supplement: tpmd170897.SD1.pdf [file tpmd170897.SD1.pdf]

**Table S1.** List of manuscripts and case-control studies included

| <b>Author</b>    | <b>Year</b> | <b>Country</b>                | <b>Outbreak Setting</b> | <b>Outbreak year</b> | <b>WHO Cholera Definition</b> | <b>Cases</b> | <b>Controls</b> | <b>Summary Bias Score</b> |
|------------------|-------------|-------------------------------|-------------------------|----------------------|-------------------------------|--------------|-----------------|---------------------------|
| Acosta et al     | 2001        | Tanzania                      | Rural                   | 1997                 | Yes                           | 180          | 360             | HIGH                      |
| Beatty et al     | 2004        | Republic of Marshalls Islands | Urban                   | 2000                 | Yes                           | 53           | 104             | LOW                       |
| Rama and Sougata | 2011        | India                         | Rural                   | 2009                 | Yes                           | 57           | 171             | MEDIUM                    |
| Birmingham et al | 1997        | Burundi                       | Urban                   | 1992                 | Yes                           | 56           | 112             | HIGH                      |
| Cummings et al   | 2012        | Uganda                        | Rural                   | 2010                 | No                            | 99           | 99              | HIGH                      |
| DuBois et al     | 2006        | Zambia                        | Urban                   | 2003-2004            | Yes                           | 71           | 71              | HIGH                      |
| Dunkle et al     | 2011        | Haiti                         | Urban                   | 2010                 | Yes                           | 53           | 106             | HIGH                      |
| Fredrick T et al | 2015        | India                         | Urban                   | 2012                 | Yes                           | 66           | 88              | HIGH                      |
| Grandesso et al  | 2014        | Haiti                         | Urban                   | 2010                 | Yes                           | 90           | 180             | LOW                       |
| Grandesso et al  | 2014        | Haiti                         | Urban                   | 2010                 | Yes                           | 90           | 180             | LOW                       |
| Hatch et all     | 1994        | Malawi                        | Refugee camp            | 1988                 | No                            | 48           | 441             | MEDIUM                    |
| Hoge et al       | 1996        | Thailand                      | Urban                   | 1993                 | Yes                           | 105          | 210             | LOW                       |
| Hoge et al       | 1996        | Thailand                      | Urban                   | 1993                 | Yes                           | 103          | 206             | LOW                       |
| Izadi et al      | 2006        | Iran                          | Rural                   | 2004                 | No                            | 85           | 85              | MEDIUM                    |
| Koo D et al      | 1996        | Guatemala                     | Urban                   | 1991                 | Yes                           | 26           | 52              | HIGH                      |
| Mahamud et al    | 2012        | Kenya                         | Refugee camp            | 2009                 | No                            | 93           | 93              | LOW                       |
| Moren et al      | 1991        | Malawi                        | Refugee camp            | 1988                 | No                            | 51           | 51              | HIGH                      |
| Mridha P et al   | 2011        | India                         | Urban                   | 2010                 | Yes                           | 60           | 120             | LOW                       |
| Mugoya et al     | 2008        | Kenya                         |                         | 2005                 | No                            | 34           | 68              | MEDIUM                    |

## Review of WASH factors in cholera case-control studies

|                    |      |                                |                 |           |     |     |     |        |
|--------------------|------|--------------------------------|-----------------|-----------|-----|-----|-----|--------|
| Mugoya et al       | 2008 | Kenya                          |                 | 2005      | No  | 34  | 68  | MEDIUM |
| Mujica et al       | 1994 | Peru                           | Urban           | 1991      | No  | 50  | 100 | HIGH   |
| Nguyen et al       | 2014 | Sierra Leone                   | Urban           | 2012      | Yes | 49  | 98  | LOW    |
| Nsagha et al       | 2015 | Cameroon                       | Rural           | 2011      | No  | 34  | 101 | LOW    |
| O'Connor et al     | 2011 | Haiti                          | Rural           | 2010      | Yes | 49  | 98  | MEDIUM |
| Quick et al        | 1995 | El Salvador                    | Rural           | 1991      | Yes | 24  | 48  | MEDIUM |
| Ries et al         | 1992 | Peru                           | Urban           | 1991      | Yes | 50  | 100 | HIGH   |
| Rodrigues et al    | 1997 | Guinea- Bissau                 | Urban           | 1994-1995 | Yes | 206 | 206 | HIGH   |
| Rodrigues et al    | 2000 | Guinea-Bissau                  | Urban           | 1996      | Yes | 221 | 221 | MEDIUM |
| Rosewell, et al    | 2012 | Papua New Guinea               | Urban           | 2009      | No  | 54  | 122 | MEDIUM |
| Sasaki, S          | 2008 | Zambia                         | Urban           | 2003-2004 | Yes | 40  | 80  | HIGH   |
| Shapiro et al      | 1999 | Kenya                          | Rural           | 1997      | Yes | 103 | 113 | HIGH   |
| Shultz et al       | 2009 | Kenya                          | Refugee camp    | 2005      | No  | 90  | 170 | HIGH   |
| Siddiqui et al     | 2006 | Pakistan                       | Rural           | 2002      | No  | 30  | 194 | HIGH   |
| Siddiqui et al     | 2006 | Pakistan                       | Rural           | 2003      | Yes | 37  | 71  | HIGH   |
| Swerdlow et al     | 1997 | Malawi                         | Refugee camp    | 1990      | No  | 50  | 50  | HIGH   |
| Swerdlow et al     | 1997 | Malawi                         | Refugee camp    | 1990      | No  | 47  | 137 | HIGH   |
| Swerdlow et al     | 1992 | Peru                           | Urban           | 1991      | No  | 46  | 65  | HIGH   |
| Ujjiga et al       | 2015 | South Sudan                    |                 | 2014      | No  | 134 | 134 | HIGH   |
| Von Seidlein et al | 2008 | Mozambique                     | Urban           |           | Yes | 40  | 127 | HIGH   |
| Weber et al        | 1994 | Ecuador                        | Urban           | 1991      | Yes | 63  | 126 | MEDIUM |
| Cárdenas V et al   | 1993 | Colombia                       | Urban           | 1992      | Yes | 32  | 38  | HIGH   |
| De Guzman et al    | 2015 | Philippines                    | Urban and Rural | 2012      | No  | 55  | 110 | HIGH   |
| Fatiregun et al    | 2013 | Nigeria                        | Urban           | 2010      | No  | 22  | 44  | HIGH   |
| Hutin et al        | 2003 | Nigeria                        | Urban           |           | No  | 102 | 77  | HIGH   |
| Kirk MD et al      | 2005 | Federated States of Micronesia | Urban           | 2000      | Yes | 53  | 53  | MEDIUM |

Review of WASH factors in cholera case-control studies

|                      |      |            |       |      |     |     |     |        |
|----------------------|------|------------|-------|------|-----|-----|-----|--------|
| Kone-Coulibaly et al | 2010 | Zimbabwe   | Urban | 2008 | No  | 140 | 140 | MEDIUM |
| Opore J et al        | 2012 | Ghana      | Urban | 2010 | No  | 39  | 78  | HIGH   |
| St. Louis et al      | 1990 | Guinea     | Urban | 1986 | Yes | 35  | 70  | MEDIUM |
| Uthappa et al        | 2015 | India      | Rural | 2013 | No  | 138 | 138 | HIGH   |
| Izadi et al          | 2005 | Iran       | Rural | 2003 | No  | 20  | 89  | HIGH   |
| Reller et al         | 2001 | Madagascar | Urban | 2000 | Yes | 37  | 74  | HIGH   |

**Table S2.** Summary odds ratios and heterogeneity analysis for WASH exposures in cholera outbreaks

|                                    | <b>E(n)</b>                             | <b>M(n)</b> | <b>OR (95% CI)</b> | <b>I<sup>2</sup></b> | <b>E(n)</b>                          | <b>M(n)</b> | <b>OR (95% CI)</b> | <b>I<sup>2</sup></b> |
|------------------------------------|-----------------------------------------|-------------|--------------------|----------------------|--------------------------------------|-------------|--------------------|----------------------|
|                                    | <b>Improved Water Source</b>            |             |                    |                      | <b>Unimproved Water Source</b>       |             |                    |                      |
| <b>All</b>                         | 28                                      | 18          | 1.1 (0.54 – 2.2)   | 91%**                | 38                                   | 23          | 3.4 (2.5 – 4.7)    | 71%**                |
| <b>Low &amp; Med Bias</b>          | 11                                      | 6           | 0.68 (0.17 – 2.7)  | 94%**                | 14                                   | 10          | 2.5 (1.3 – 5.1)    | 82%**                |
| <b>WHO Def</b>                     | 21                                      | 13          | 1.7 (0.86 – 3.4)   | 86%**                | 17                                   | 11          | 3.7 (2.3 – 5.8)    | 56%**                |
| <b>Low Bias</b>                    | 3                                       | 1           | -                  | -                    | 7                                    | 6           | 2.5 (1.0-6.1)      | 72%                  |
| <b>Low Bias &amp; WHO Def</b>      | 3                                       | 1           | -                  | -                    | 4                                    | 2           | -                  | -                    |
| <b>Low &amp; Med &amp; WHO Def</b> | 9                                       | 5           | 1.5 (0.38 – 5.5)   | 88%**                | 7                                    | 4           | 2.4 (0.78 – 7.7)   | 75%**                |
|                                    | <b>Bottled Water</b>                    |             |                    |                      | <b>Surface Water Contact</b>         |             |                    |                      |
| <b>All</b>                         | 7                                       | 5           | 0.35 (0.13 - 0.96) | 77%**                | 10                                   | 7           | 2.3 (1.1 – 4.8)    | 92%**                |
| <b>Low &amp; Med Bias</b>          | 1                                       | 1           | -                  | -                    | 4                                    | 3           | -                  | -                    |
| <b>WHO Def</b>                     | 4                                       | 3           | -                  | -                    | 6                                    | 4           | 3.0 (1.0 – 8.7)    | 95%**                |
| <b>Low Bias</b>                    | 1                                       | 1           | -                  | -                    | 0                                    | 0           | -                  | -                    |
| <b>Low Bias &amp; WHO Def</b>      | 1                                       | 1           | -                  | -                    | 0                                    | 0           | -                  | -                    |
| <b>Low &amp; Med &amp; WHO Def</b> | 1                                       | 1           | -                  | -                    | 3                                    | 2           | -                  | -                    |
|                                    | <b>Treated Water</b>                    |             |                    |                      | <b>Untreated Water</b>               |             |                    |                      |
| <b>All</b>                         | 40                                      | 14          | 0.44 (0.35 - 0.56) | 61%**                | 34                                   | 18          | 3.5 (2.8 – 4.4)    | 48%**                |
| <b>Low &amp; Med Bias</b>          | 22                                      | 6           | 0.47 (0.46 - 0.60) | 46%**                | 20                                   | 8           | 4.1 (2.9 – 5.9)    | 55%**                |
| <b>WHO Def</b>                     | 35                                      | 11          | 0.52 (0.42 - 0.64) | 49%**                | 27                                   | 14          | 3.6 (2.7 – 4.8)    | 56%**                |
| <b>Low Bias</b>                    | 9                                       | 3           | 0.61 (0.46 – 0.82) | 21%                  | 11                                   | 3           | 3.6 (2.6 – 5.0)    | 14%                  |
| <b>Low Bias &amp; WHO Def</b>      | 8                                       | 2           | 0.65 (0.49 – 0.85) | 12%                  | 11                                   | 3           | 3.6 (2.6 – 5.0)    | 14%                  |
| <b>Low &amp; Med &amp; WHO Def</b> | 21                                      | 5           | 0.48 (0.37 - 0.62) | 47%**                | 18                                   | 7           | 4.3 (2.9 – 6.2)    | 60%**                |
|                                    | <b>Safe Storage and Transport</b>       |             |                    |                      | <b>Unsafe Storage and Transport</b>  |             |                    |                      |
| <b>All</b>                         | 22                                      | 9           | 0.55 (0.39 - 0.80) | 57%**                | 22                                   | 13          | 2.8 (2.1 – 3.7)    | 45%*                 |
| <b>Low &amp; Med Bias</b>          | 16                                      | 5           | 0.42 (0.28 - 0.63) | 46%*                 | 10                                   | 6           | 2.6 (1.4 – 4.6)    | 70%**                |
| <b>WHO Def</b>                     | 18                                      | 7           | 0.51 (0.32 - 0.80) | 62%**                | 11                                   | 7           | 2.4 (1.5 - 3.7)    | 65%**                |
| <b>Low Bias</b>                    | 11                                      | 1           | -                  | -                    | 4                                    | 2           | -                  | -                    |
| <b>Low Bias &amp; WHO Def</b>      | 11                                      | 1           | -                  | -                    | 4                                    | 2           | -                  | -                    |
| <b>Low &amp; Med &amp; WHO Def</b> | 16                                      | 5           | 0.42 (0.28 - 0.63) | 46%*                 | 5                                    | 4           | 1.6 (0.63 – 4.0)   | 80%**                |
|                                    | <b>Improved Sanitation</b>              |             |                    |                      | <b>Open defecation</b>               |             |                    |                      |
| <b>All</b>                         | 16                                      | 11          | 1.4 (0.90 – 2.1)   | 68%**                | 7                                    | 5           | 5.6 (3.5 - 9.1)    | 0.0%                 |
| <b>Low &amp; Med Bias</b>          | 10                                      | 5           | 1.3 (0.69 – 2.5)   | 74%**                | 5                                    | 4           | 5.1 (3.0 - 8.5)    | 0.0%                 |
| <b>WHO Def</b>                     | 10                                      | 6           | 1.4 (0.83 – 2.5)   | 60%**                | 2                                    | 2           | -                  | -                    |
| <b>Low Bias</b>                    | 4                                       | 2           | -                  | -                    | 1                                    | 1           | -                  | -                    |
| <b>Low Bias &amp; WHO Def</b>      | 3                                       | 1           | -                  | -                    | 0                                    | 0           | -                  | -                    |
| <b>Low &amp; Med &amp; WHO Def</b> | 7                                       | 3           | 1.2 (0.58-2.7)     | 59%*                 | 2                                    | 2           | -                  | -                    |
|                                    | <b>Self-reported good hygiene</b>       |             |                    |                      | <b>Unimproved Sanitation</b>         |             |                    |                      |
| <b>All</b>                         | 39                                      | 22          | 0.35 (0.27 - 0.45) | 65%**                | 13                                   | 9           | 2.5 (1.2 – 4.9)    | 76%**                |
| <b>Low &amp; Med Bias</b>          | 21                                      | 12          | 0.31 (0.22 – 0.43) | 60%**                | 6                                    | 4           | 1.9 (0.96 – 4.0)   | 49%                  |
| <b>WHO Def</b>                     | 24                                      | 14          | 0.33 (0.23 – 0.46) | 62%**                | 7                                    | 5           | 4.3 (1.6 – 11)     | 81%**                |
| <b>Low Bias</b>                    | 9                                       | 3           | 0.25 (0.15 – 0.41) | 72%**                | 4                                    | 2           | -                  | -                    |
| <b>Low Bias &amp; WHO Def</b>      | 7                                       | 3           | 0.24 (0.12 – 0.45) | 79%**                | 3                                    | 1           | -                  | -                    |
| <b>Low &amp; Med &amp; WHO Def</b> | 14                                      | 8           | 0.28 (0.18 – 0.44) | 63%**                | 4                                    | 2           | -                  | -                    |
|                                    | <b>Observation of hygiene materials</b> |             |                    |                      | <b>Shared Sanitation</b>             |             |                    |                      |
| <b>All</b>                         | 28                                      | 11          | 0.34 (0.23 - 0.49) | 67%**                | 14                                   | 7           | 1.9 (1.5 - 2.4)    | 0.0%                 |
| <b>Low &amp; Med Bias</b>          | 19                                      | 7           | 0.30 (0.21 – 0.42) | 50%**                | 6                                    | 2           | 1.8 (1.1-2.7)      | 24%                  |
| <b>WHO Def</b>                     | 20                                      | 5           | 0.29 (0.20 – 0.42) | 45%*                 | 10                                   | 5           | 1.8 (1.3-2.5)      | 0.0%                 |
| <b>Low Bias</b>                    | 5                                       | 2           | -                  | -                    | 6                                    | 2           | -                  | -                    |
| <b>Low Bias &amp; WHO Def</b>      | 4                                       | 1           | -                  | -                    | 5                                    | 1           | -                  | -                    |
| <b>Low &amp; Med &amp; WHO Def</b> | 14                                      | 3           | 0.32 (0.21 – 0.49) | 45%*                 | 5                                    | 1           | -                  | -                    |
|                                    |                                         |             |                    |                      | <b>Self-reported lack of hygiene</b> |             |                    |                      |
| <b>All</b>                         | 11                                      | 5           | 3.8 (2.4 – 5.8)    | 43%                  |                                      |             |                    |                      |
| <b>Low &amp; Med Bias</b>          | 6                                       | 2           | 3.7 (2.3-6.0)      | 8.0%                 |                                      |             |                    |                      |
| <b>WHO Def</b>                     | 0                                       | 0           | -                  | -                    |                                      |             |                    |                      |

## Review of WASH factors in cholera case-control studies

|                                    |   |   |   |   |
|------------------------------------|---|---|---|---|
| <b>Low Bias</b>                    | 0 | 0 | - | - |
| <b>Low Bias &amp; WHO Def</b>      | 0 | 0 | - | - |
| <b>Low &amp; Med &amp; WHO Def</b> | 0 | 0 | - | - |

E (N) = number of factors with OR reported; M (N) = number of manuscripts; \*significant at the p<0.05 level; \*\*significant at the p<0.01 level
